# Supplementary material
Source: ML conference proceedings conference paper supplement (https://proceedings.mlr.press/v129/liang20a.html)
Supplement: Supplementary file [file liang20a-supp.pdf]

## I. SUPPLEMENTARY MATERIALS

## A. Example Scans with Synthesized Pathologies

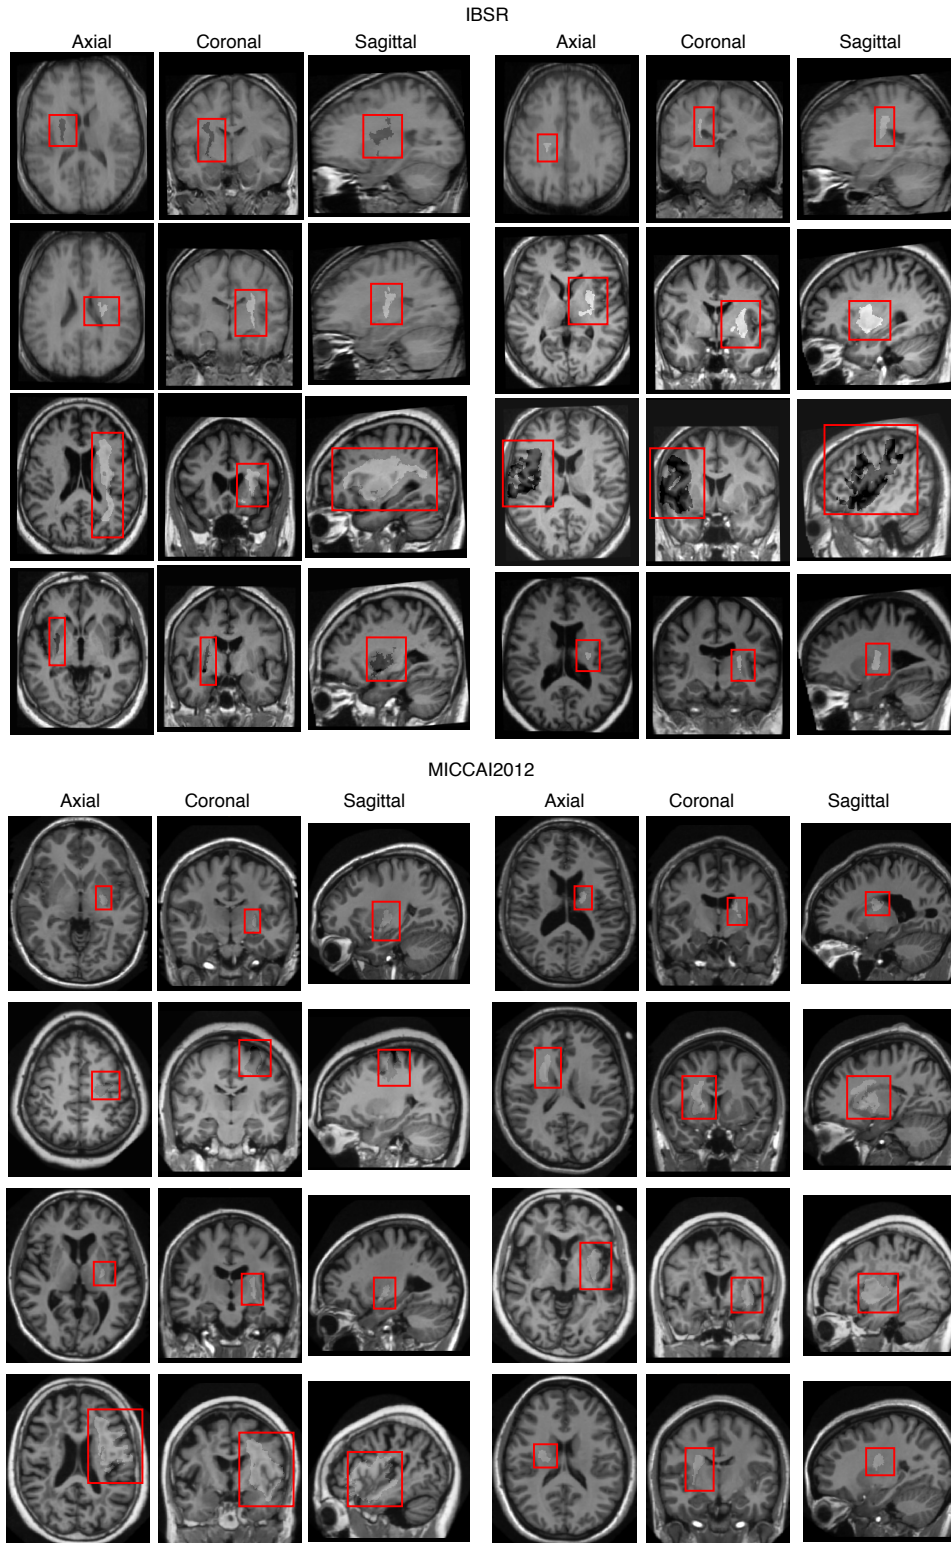

Fig. 1. 16 examples of the augmented scans with synthesized pathologies from IBSR and MICCAI2012 datasets. Each 3D scan is visualized with axial, coronal and sagittal views that contain pathologies. Red boxes localize the pathological areas.

### B. Example Segmentation Results on Pathological Scans

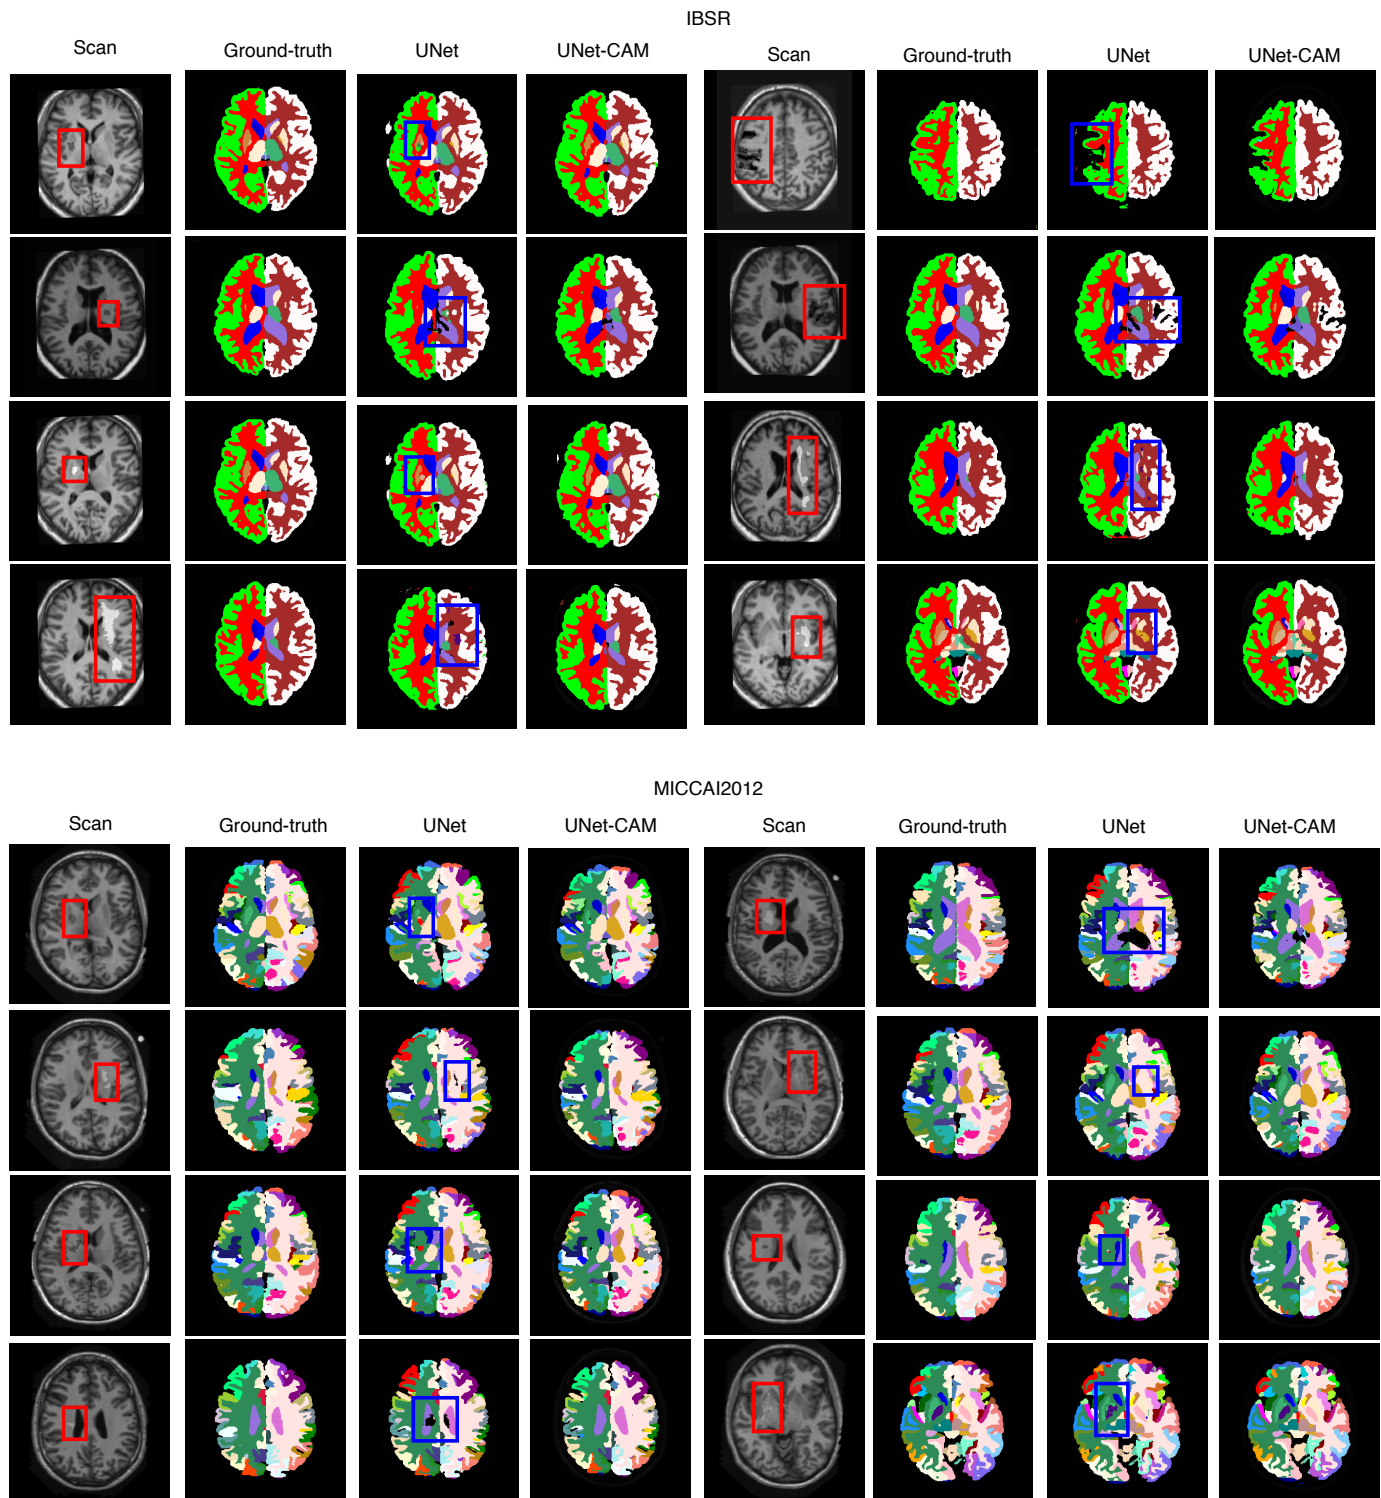

Fig. 2. Segmentation on 16 examples scans with pathologies from IBSR and MICCAI2012 datasets. Results from UNet and UNet-CAM are compared. Each 3D scan and its segmentation map are visualized with the axial view. Red boxes localize the pathological areas. Blue boxes highlight the spurious segmentation within UNet results, while UNet-CAM largely reduces the errors.

*C. Overlapping Anatomies in IBSR and MICCAI2012 for Cross-Dataset Evaluation*

TABLE I  
OVERLAPPING ANATOMY ANNOTATIONS WITHIN IBSR AND MICCAI2012 DATASETS, WHICH ARE USED FOR CROSS-DATASET TRAINING EXPERIMENTS.

| Anatomy name            | Label in MICCAI2012 | Label in IBSR |
|-------------------------|---------------------|---------------|
| Brain stem              | 7                   | 16            |
| Right caudate           | 8                   | 50            |
| Left caudate            | 9                   | 11            |
| Right hippocampus       | 17                  | 53            |
| Left hippocampus        | 18                  | 17            |
| Right lateral ventricle | 21                  | 43            |
| Left lateral ventricle  | 22                  | 4             |
| Right pallidum          | 23                  | 52            |
| Left pallidum           | 24                  | 13            |
| Right putamen           | 25                  | 51            |
| Left putamen            | 26                  | 12            |
| Right thalamus proper   | 27                  | 49            |
| Left thalamus proper    | 28                  | 10            |
| Right ventral DC        | 29                  | 60            |
| Left ventral DC         | 30                  | 28            |
